# Supplementary material for: Luminescence properties of epitaxial Cu2O thin films electrodeposited on metallic substrates and Cu2O single crystals
Source: Preprints.org preprint supplement (doi:10.20944/preprints202304.0965.v1), 2023-04-26
Supplement: Supplementary file 3 [file supplementary]

**Supporting information**

**Luminescence properties of epitaxial Cu2O thin films electrodeposited on metallic substrates and Cu2O single crystals**

Laima Trinkler1, Dajin Dai2, Liuwen Chang2,3, Mitch Ming-Chi Chou2,3, Tzu-Ying Wu2, Jevgenijs Gabrusenoks1, Dace Nilova1, Rihards Ruska, Baiba Berzina1, Ramunas Nedzinskas1,4

*1 Institute of Solid State Physics, University of Latvia, Kengaraga St.8, Riga LV-1063, Latvia*

*2 Department of Materials and Optoelectronic Science, National Sun Yat-sen University, Kaohsiung 80424, Taiwan*

*3 Center of Crystal Research, National Sun Yat-sen University, Kaohsiung 80424, Taiwan*

*4 Center for Physical Sciences and Technology, Saulėtekio ave. 3, Vilnius LT-10257, Lithuania*

Figure S1. Peak position of the main emission bands of Cu2O single crystals SC(100) and SC(111) under laser excitation power 0.2 and 15 mW in 10-300 K temperature range. Samples and excitation power are shown in the legend.

|  |  |
| --- | --- |
| Figure S2. Spectral properties of Cu2O thin film on Ag polycrystalline substrate (sample 39) under 532 nm laser excitation: (a) Thermal evolution of PL spectra; (b) polarized PL spectra at different angular positions of the analyzer at 10 K (angular degrees are shown on the graph). | |

|  |  |
| --- | --- |
| Figure S3. Thermal evolution of PL subbands for thin film sample 39: (a) PL intensity; (b) Arrhenius plot: 1 - 680 nm , 2 – 735 nm, 3 – 820 nm, 4 - 920 nm. | |

Figure S4. Thermal evolution of PL spectrum of Cu2O thin film on Ag polycrystalline substrate (sample 40) under 532 nm laser excitation.

|  |  |
| --- | --- |
| Figure S5. Thermal evolution of PL subbands for thin film sample 40: (a) PL intensity; (b) Arrhenius plot: 1 – 660 nm; 2 - 680 nm , 3 – 735 nm, 4– 820 nm, 5 - 920 nm. | |
